# Supplementary material for: Computational model of inductively coupled plasma sources in comparison to experimental data for different torch designs and plasma conditions. Part I: experimental study
Source: Royal Society of Chemistry journal article supplement (doi:10.1039/c6ja00191b), 2016-12-05
Supplement: c6ja00191b1.pdf [file c6ja00191b1.pdf]

Electronic Supplementary Information for: Computational model of inductively coupled plasma sources in comparison to experimental data for different torch designs and plasma conditions. Part I: experimental study

**M. Voronov<sup>\*1</sup>, V. Hoffmann<sup>2</sup>, C. Engelhard<sup>3</sup>, W. Buscher<sup>1</sup>**

<sup>1</sup>University of Münster, Institute of Inorganic and Analytical Chemistry, Corrensstrasse 30, D-48149 Münster, Germany

<sup>2</sup>IFW Dresden, Institute for Complex Materials, P.O. Box 270116, D-01171 Dresden, Germany

<sup>3</sup>University of Siegen, Department of Chemistry and Biology, Adolf-Reichwein-Str. 2, D-57076 Siegen, Germany

**E-mail:** [VoronovMV@mail.ru](mailto:VoronovMV@mail.ru)

Table S-1. Wavelength, excitation energies, transition probabilities and degree of degeneracy of levels of Fe lines, which were used for calculation of the excitation temperature. Fundamental data are taken from [1]

| Wavelength (nm) | Transition probability ( $10^6 \text{ s}^{-1}$ ) | Excitation energy (eV) | Degree of degeneracy |
|-----------------|--------------------------------------------------|------------------------|----------------------|
| 371.994         | 16.2                                             | 3.33202                | 11                   |
| 373.487         | 90.1                                             | 4.1777                 | 11                   |
| 373.713         | 14.1                                             | 3.36826                | 9                    |
| 374.556         | 11.5                                             | 3.39651                | 7                    |
| 374.949         | 76.3                                             | 4.22036                | 9                    |
| 375.824         | 63.4                                             | 4.25622                | 7                    |

Table S-2. Wavelength, transition probabilities, and excitation energies of lines of the OH (0,0) rotational band ( $A^2\Sigma^+ \rightarrow X^2\Pi_i$ ), which were used for calculation of the OH rotational temperature. Fundamental data are taken from [2].

| Wavelength (nm) | Transition probability ( $10^9 \text{ s}^{-1}$ ) | Excitation energy (eV) |
|-----------------|--------------------------------------------------|------------------------|
| 308.328         | 3.37                                             | 4.06414                |
| 308.52          | 4.22                                             | 4.08507                |
| 308.734         | 5.06                                             | 4.11009                |
| 309.859         | 8.41                                             | 4.25054                |
| 311.022         | 10.88                                            | 4.39673                |
| 314.746         | 4.75                                             | 4.29517                |
| 317.708         | 6.4                                              | 4.51219                |
| 318.608         | 6.81                                             | 4.57538                |
| 319.485         | 7.22                                             | 4.64199                |

## References

1. NIST Atomic Spectra Database, available: <http://physics.nist.gov/asd>. National Institute of Standards and Technology, Gaithersburg, MD, accessed on 01.06.2015.
2. G.H. Dieke, H.M. Crosswhite, "The ultraviolet bands of OH fundamental data", *J. Quant. Spectrosc. Radiat. Transfer*, 1962, **2**, 97-199.
